# Supplementary material for: Naphthalene Diimides Carrying Two β-Cyclodextrins Prefer Telomere RNA G-Quadruplex Recognition
Source: MDPI journal article supplement (doi:10.3390/molecules27134053), 2022-06-23
Supplement: s1 [file s1]

Supplementary Information

## Naphthalene diimides carrying two $\beta$ -cyclodextrins prefer Telomere RNA G-quadruplex recognition

Tingting Zou,<sup>1</sup> Yuka Sato,<sup>1</sup> Shuma Kaneyoshi,<sup>1</sup> Kota Mano,<sup>1</sup> Rui Yasukawa,<sup>1</sup>  
Yoshifumi Nakano,<sup>1</sup> Satoshi Fujii,<sup>2</sup> Shinobu Sato,<sup>1\*</sup> Shigeori Takenaka <sup>1\*</sup>

<sup>1</sup> Department of Applied Chemistry, Kyushu Institute of Technology,  
Fukuoka, 804-8550, Japan

<sup>2</sup> Department of Bioscience and Bioinformatics Kyushu Institute of Technology,  
Fukuoka 820-8502, Japan

\* Correspondence: shige@che.kyutech.ac.jp; Tel.: +81-93-884-3322

Tables of contents

P2: Confirmation of 1 (Figure S1)

P3: Confirmation of 1 (Figure S2), Confirmation of 4 (Figure S3)

P4: Confirmation of 4 (Figure S4)

P5: Confirmation of 2 (Figure S5)

P6: Confirmation of 2 (Figure S6)

P7: CD spectra of DNAs or RNAs with adding 2 (Figure S7)

P8: CD spectra of DNAs or RNAs with adding 3 (Figure S8)

P9: UV-Vis Spectra of 1-3 with adding DNA (Figure S9)

P10: Binding curve of 1-3 with adding DNA (Figure S10)

P11: ITC measurements of 2 or 3 with DNA or RNA (Figure S11)

P11: Binding model simulation of 2 with c-myc or 12nt of telomere RNA (Figure S12)

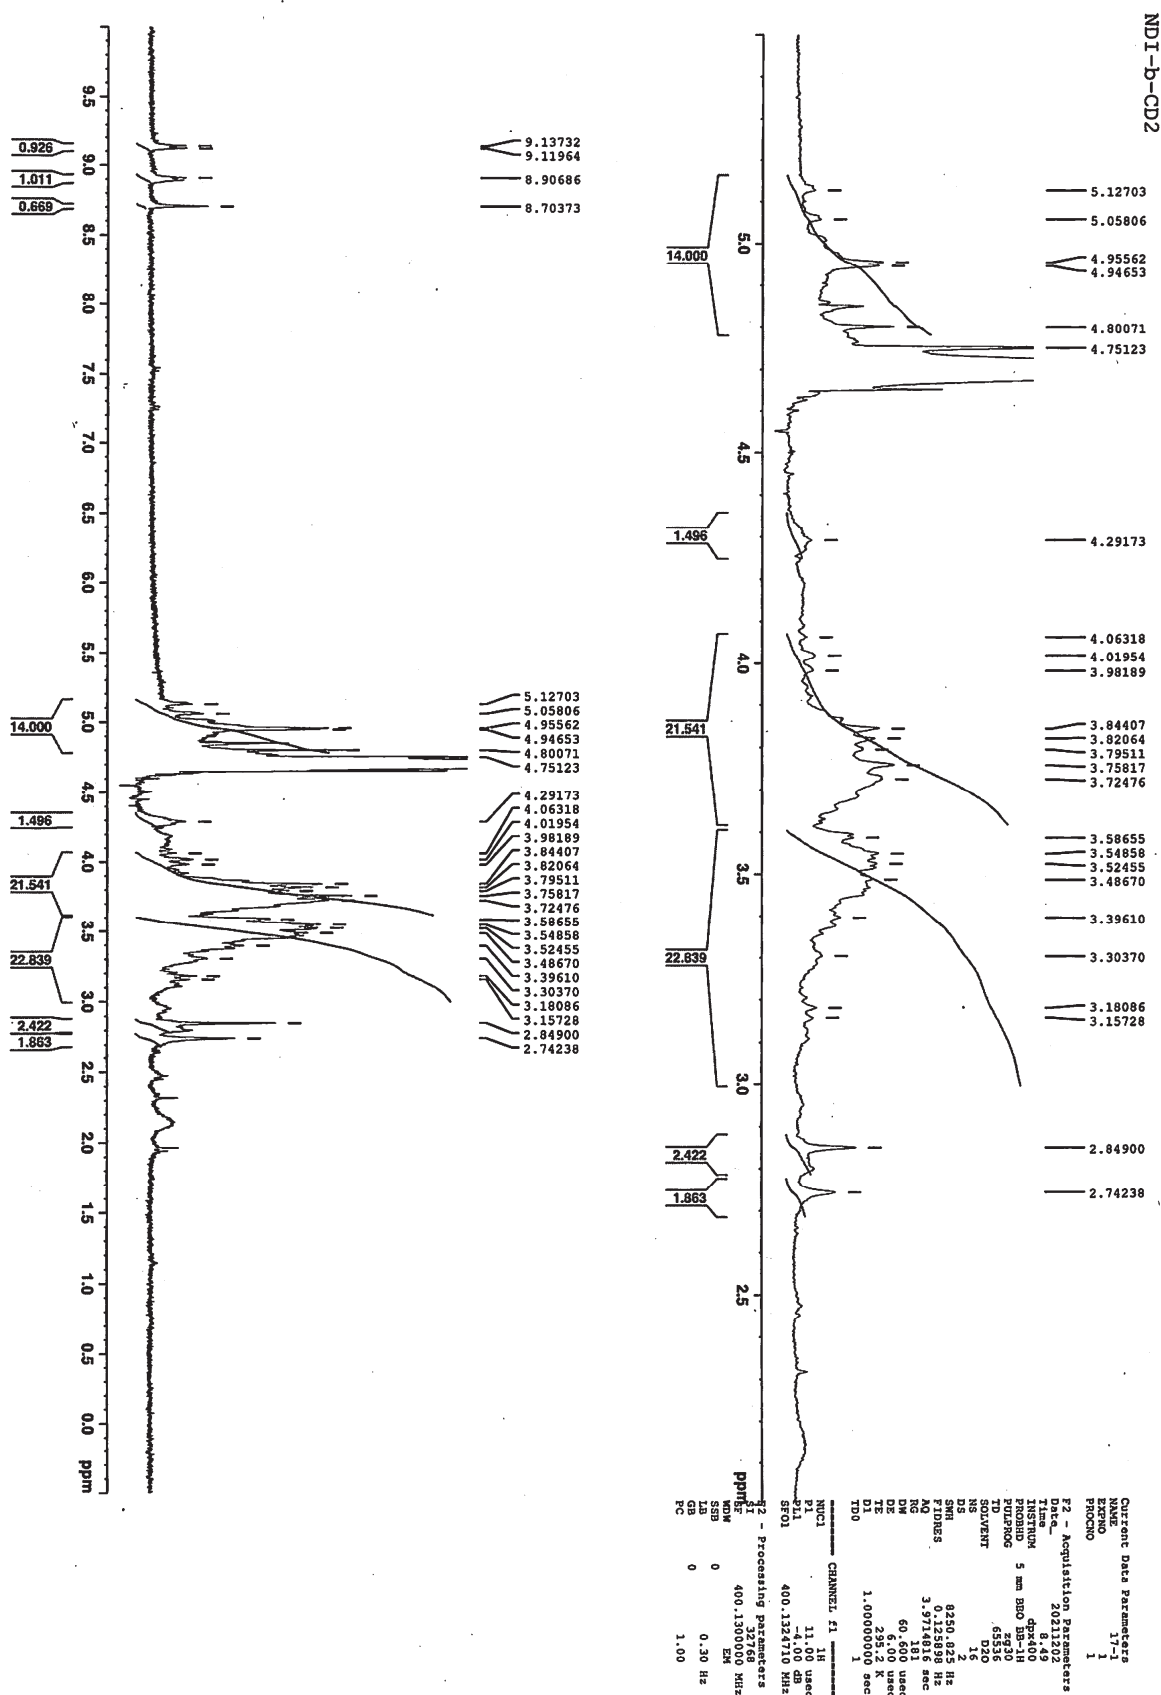

Figure S1. <sup>1</sup>H-NMR spectra of 1 in D<sub>2</sub>O.

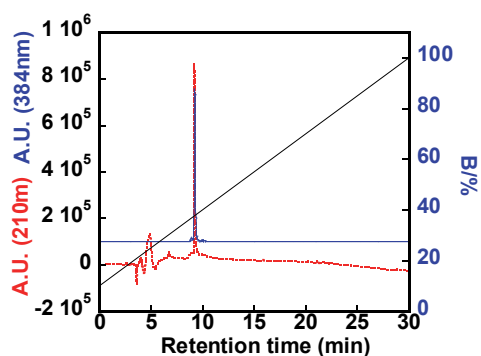

**Figure S2.** RT-HPLC of **1**. HPLC conditions; the concentration of solution B was changed (from 10% to 100%, 30 min) at 40 °C. Solution A: 0.1% trifluoroacetic acid, Solution B: 70% acetonitrile, 0.1% trifluoroacetic acid. Flow rate: 1 mL/min. Column: Inertsil ODS-4 (GL Sciences Inc., Tokyo, Japan).

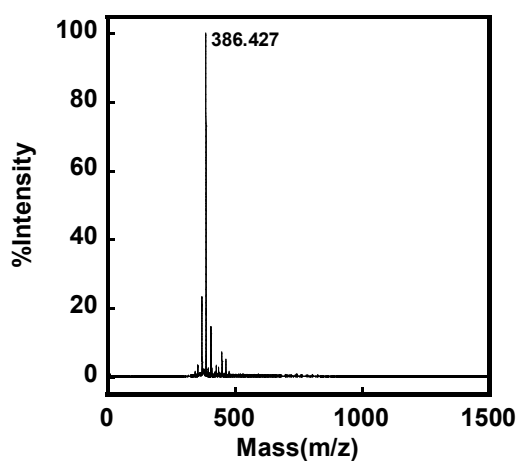

**Figure S3.** MALDI-TOF-MS spectra of **4** under positive mode (Matrix: DHBA).  $m/z = 386.427$  (calculated value of  $C_{18}H_{10}N_2O_8 + H^+ = 383.289$ ).

ndi-gly

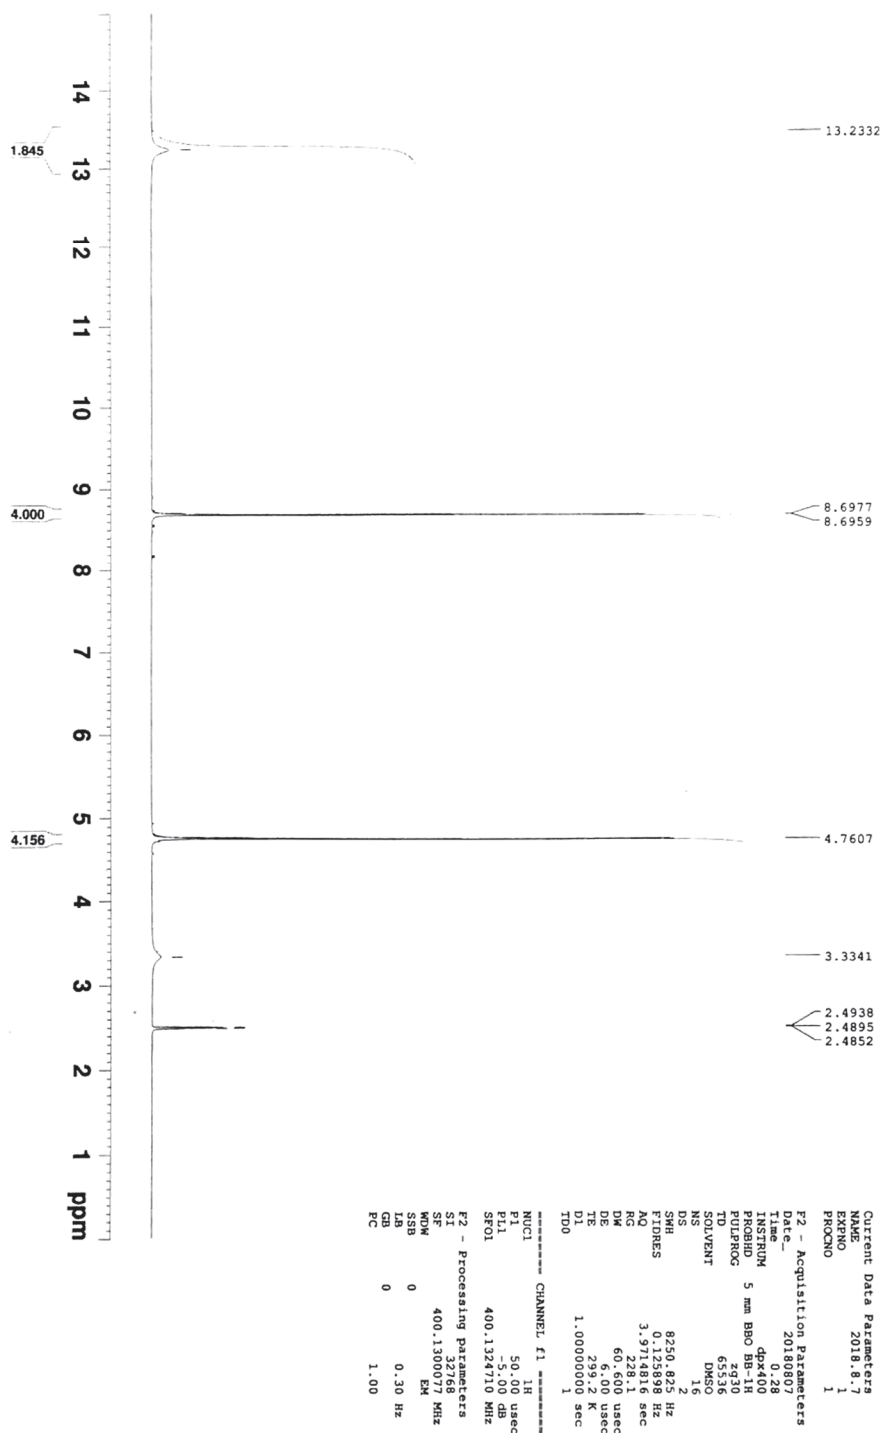

Figure S4. <sup>1</sup>H-NMR spectra of **4** in DMSO.

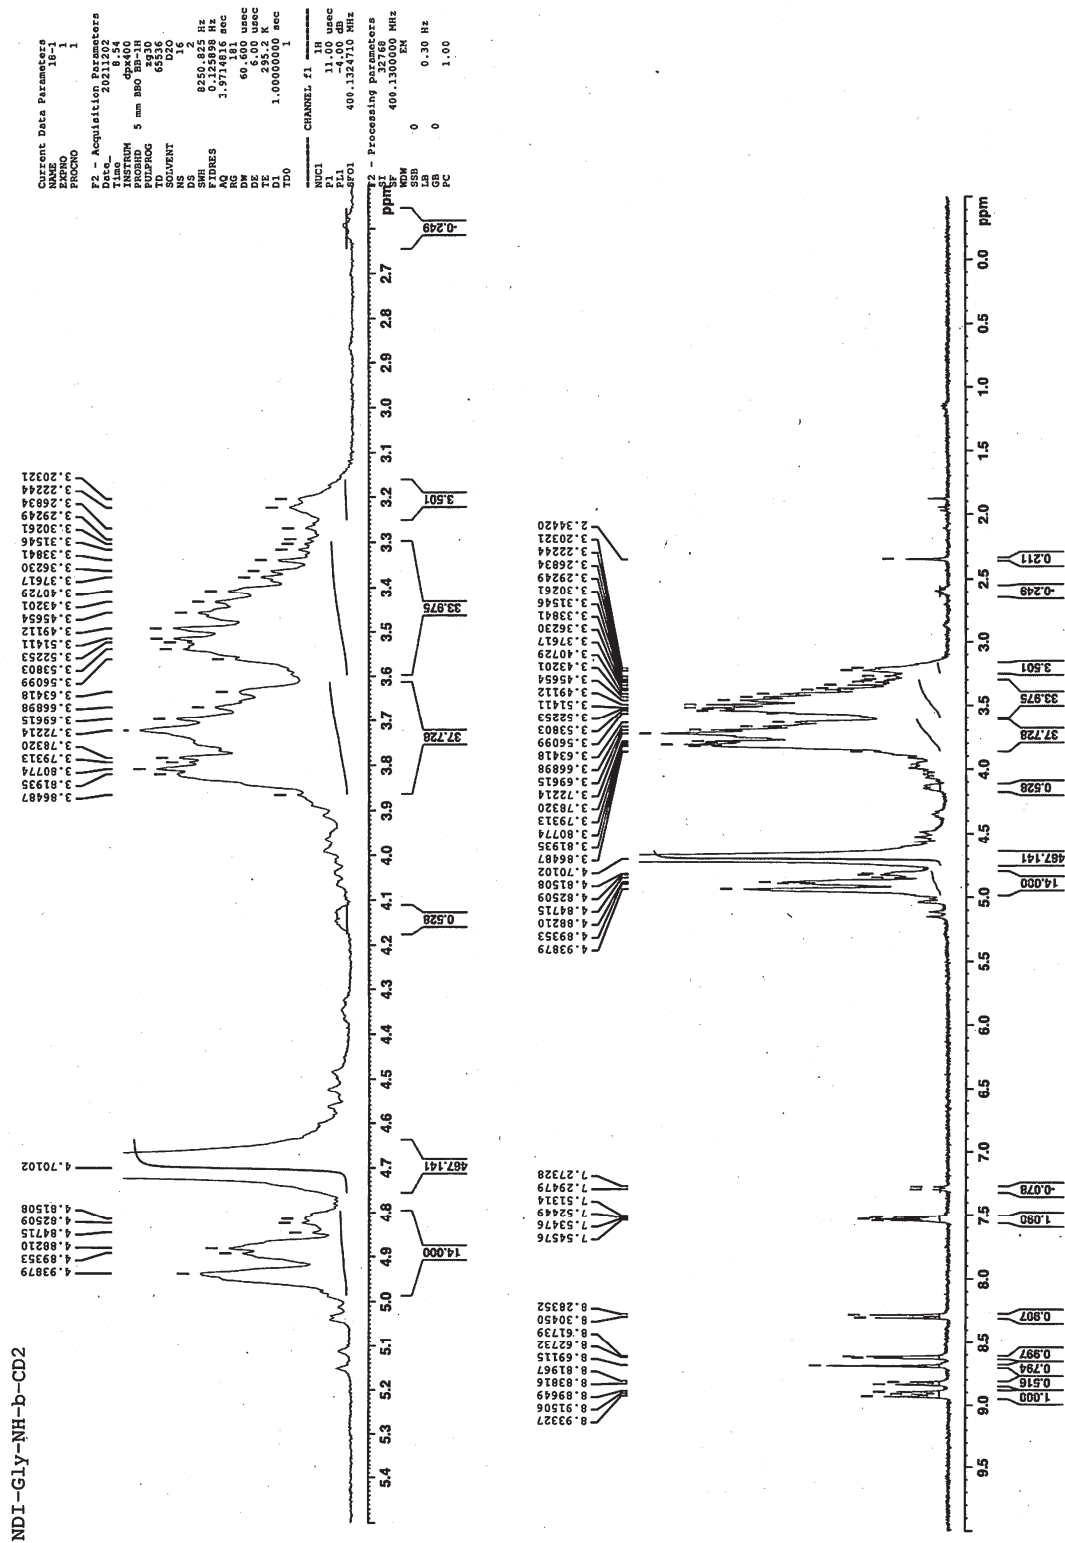

**Figure S5.**  $^1\text{H}$ -NMR spectra of **2** in  $\text{D}_2\text{O}$ .

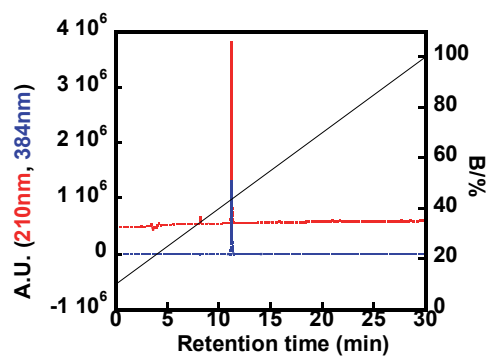

**Figure S6.** RT-HPLC of 2. HPLC conditions; the concentration of solution B was changed (from 10% to 100%, 30 min) at 40 °C. Solution A: 0.1% trifluoroacetic acid, Solution B: 70% acetonitrile, 0.1% trifluoroacetic acid. Flow rate: 1 mL/min. Column: Inertsil ODS-4 (GL Sciences Inc., Tokyo, Japan).

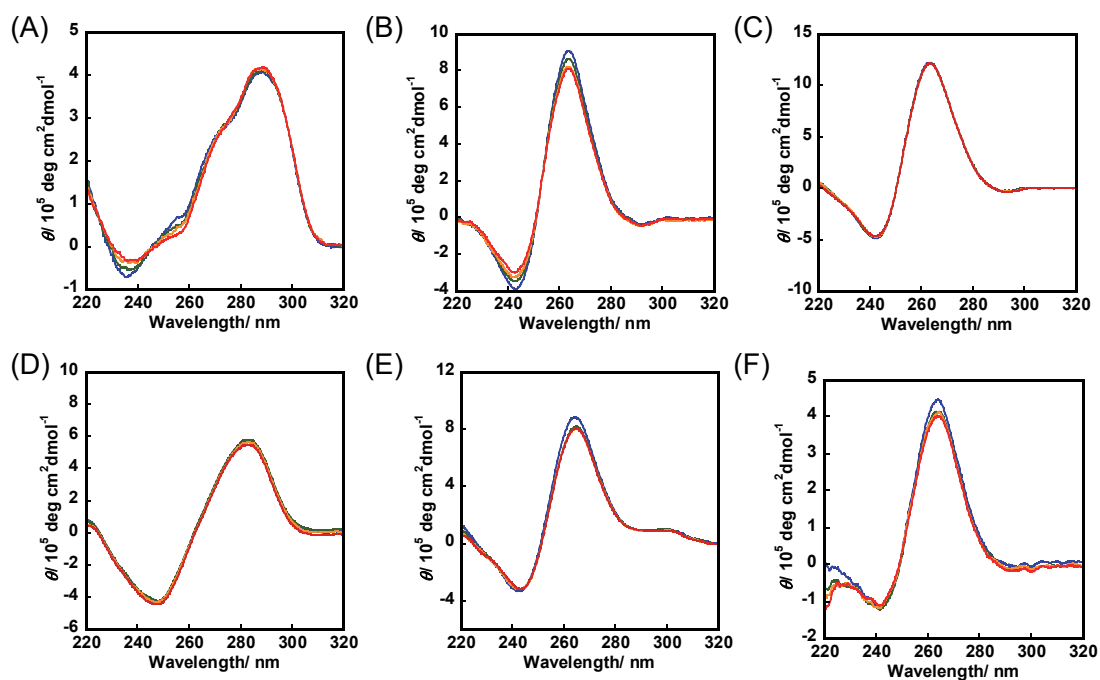

**Figure S7.** CD spectra of (A) Telomere G1, (B) c-myc, (C) c-kit, (D) ds-oligo, (E) G1-r23t, and (F) G1-r12t after adding 2. 1.5  $\mu$ M DNA, 0-4.5  $\mu$ M 2, 50 mM Tris-HCl buffer (pH 7.4) with 100 mM KCl at 25  $^{\circ}$ C. [DNA] : [2]=1:0 (blue), 1:1 (green), 1:2 (orange), 1:3 (red).

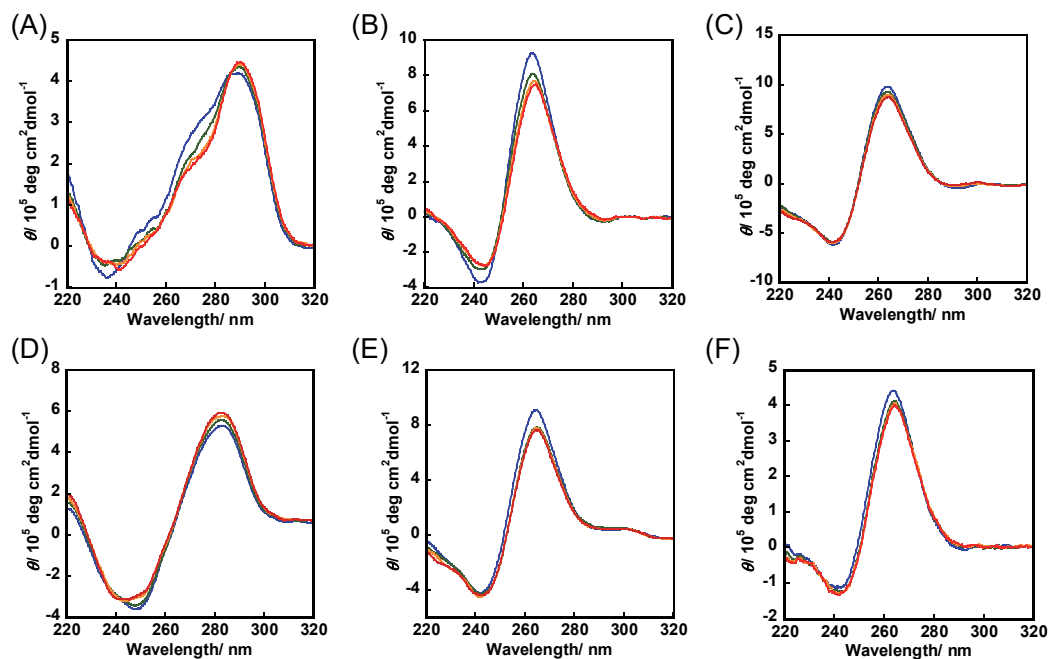

**Figure S8.** CD spectra of (A) Telomere G1, (B) c-myc, (C) c-kit, (D) ds-oligo, (E) G1-r23t, and (F) G1-r12t after adding 3. 1.5  $\mu\text{M}$  DNA, 0-4.5  $\mu\text{M}$  3, 50 mM Tris-HCl buffer (pH 7.4) with 100 mM KCl at 25  $^{\circ}\text{C}$ . [DNA] : [3]=1:0 (blue), 1:1 (green), 1:2 (orange), 1:3 (red).



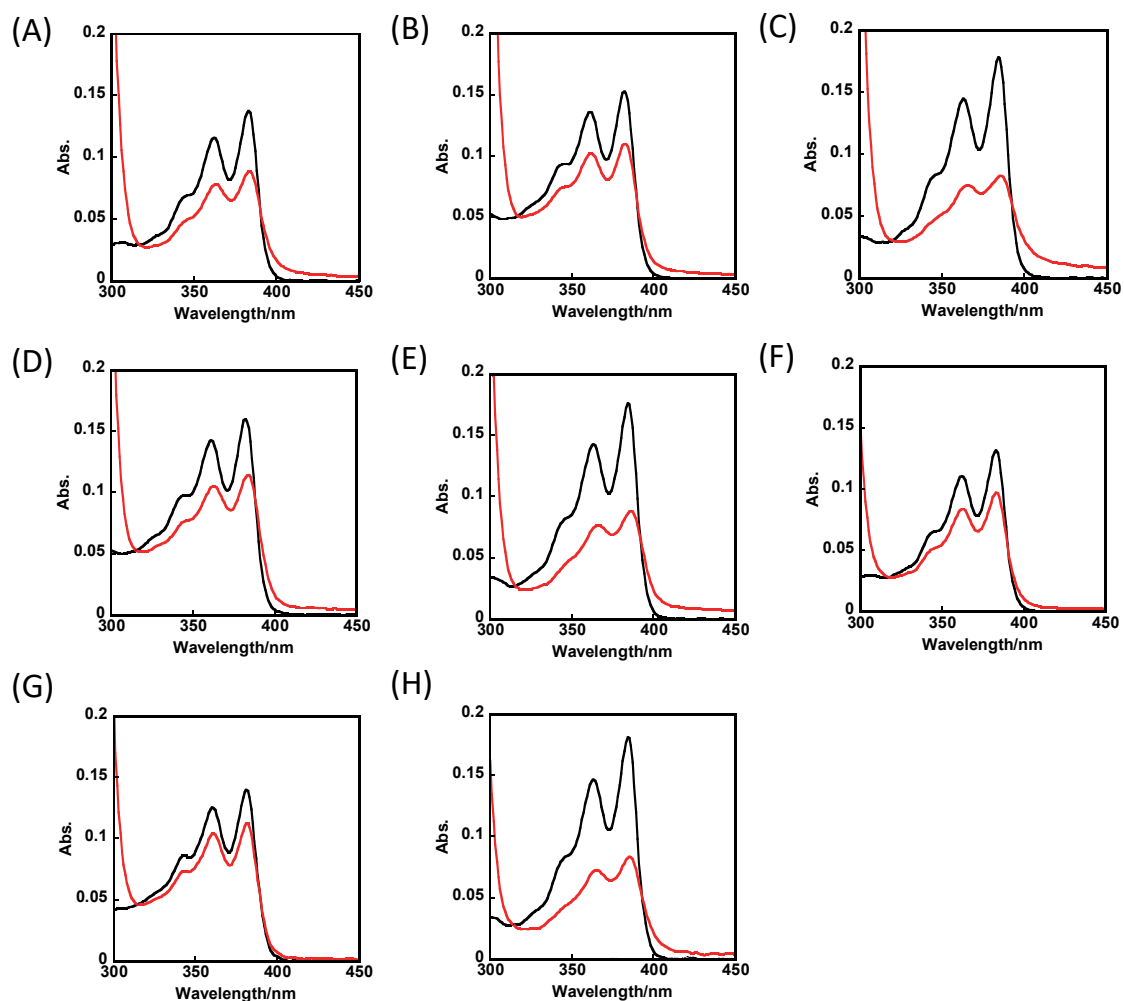

**Figure S9.** UV-Vis spectra of (A) **1** with Telomere G1, (B) **2** with Telomere G1, (C) **3** with Telomere G1, (D) **2** with c-myc, (E) **3** with c-myc, (F) **1** with ds-oligo, (G) **2** with ds-oligo, and (H) **3** with ds-oligo in 50 mM Tris-HCl buffer (pH 7.4) with 100 mM KCl at 25 °C (Before adding DNA: black line, after adding DNA: red line).

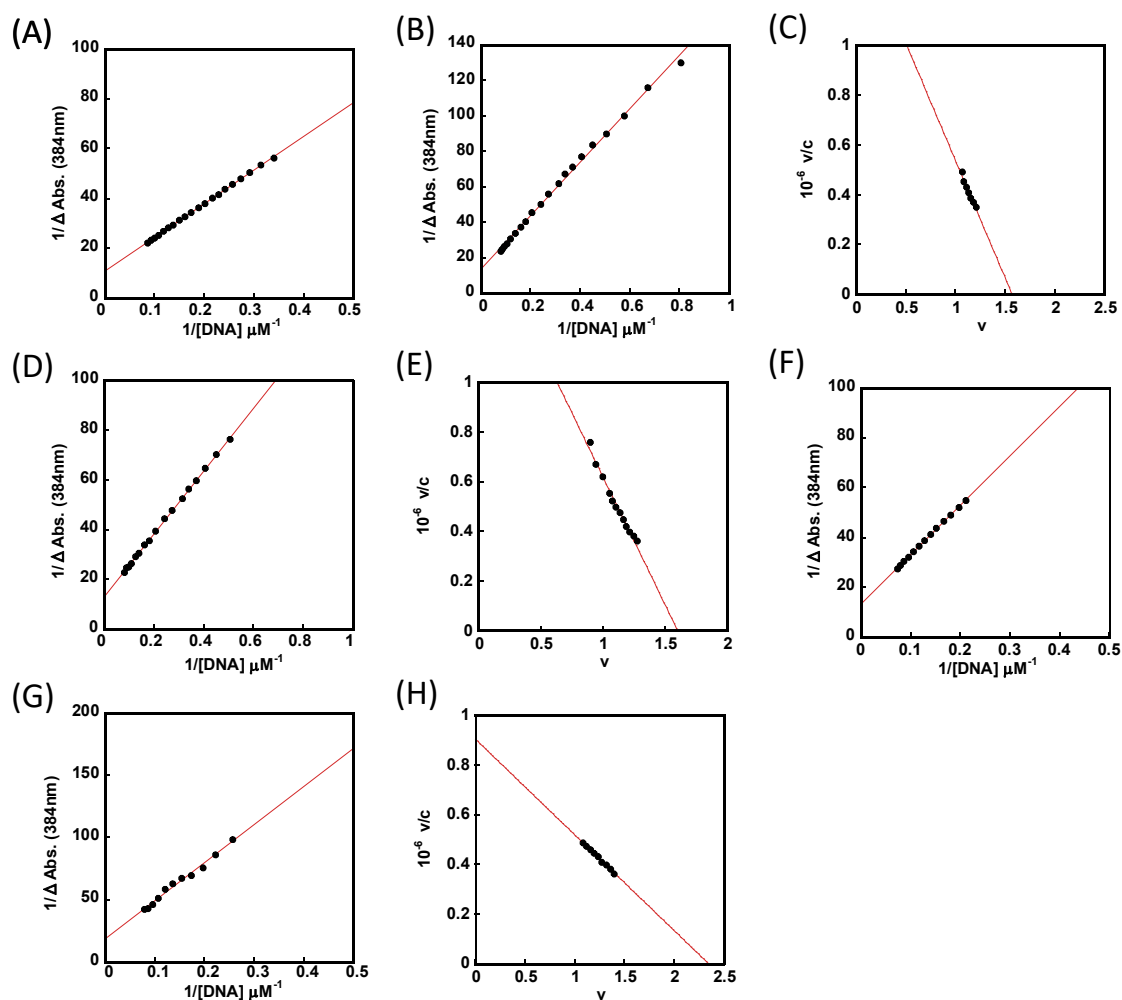

**Figure S10.** Binding analysis of (A) **1** with Telomere G1 (Benesi-Hildebrand analysis), (B) **2** with Telomere G1 (Benesi-Hildebrand analysis), (C) **3** with Telomere G1 (Scatchard analysis), (D) **2** with c-myc (Benesi-Hildebrand analysis), (E) **3** with c-myc (Scatchard analysis), (F) **1** with ds-oligo (Benesi-Hildebrand analysis), (G) **2** with ds-oligo (Benesi-Hildebrand analysis), and (H) **3** with ds-oligo (Scatchard analysis) in 50 mM Tris-HCl buffer (pH 7.4) with 100 mM KCl at 25 °C.

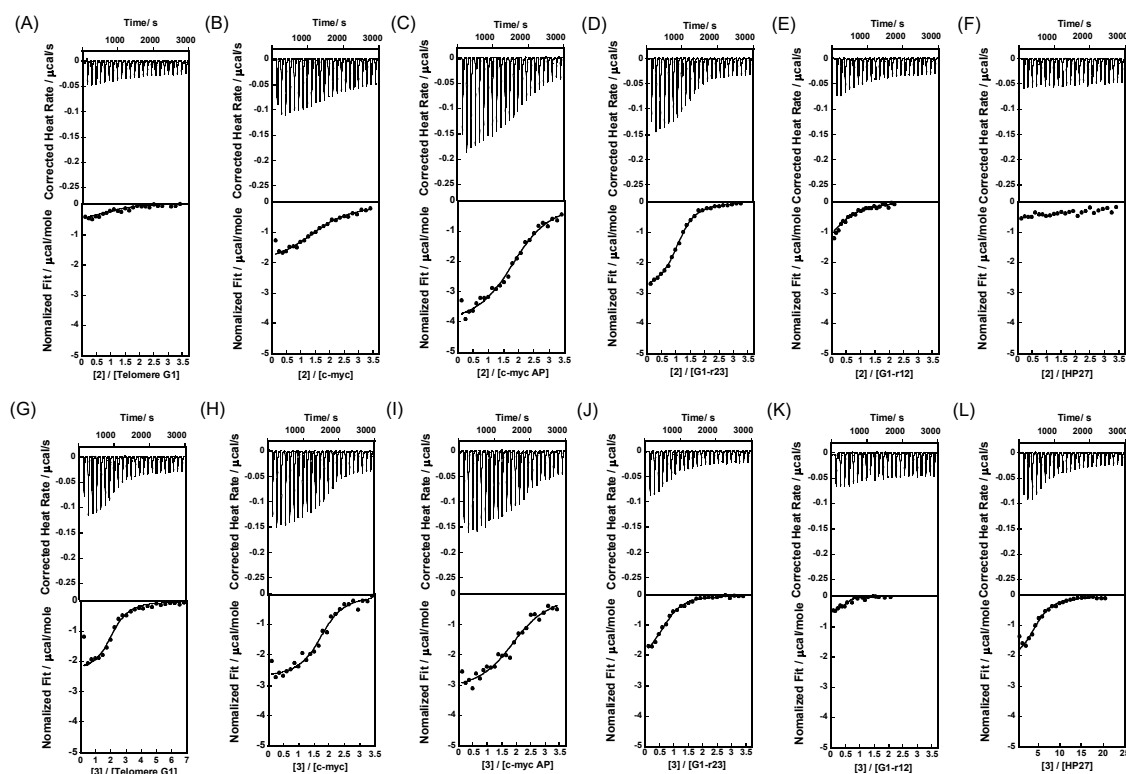

**Figure S11.** ITC measurement of (A, G) Telomere G1, (B, H) c-myc, (C, I) c-myc AP site, (D, J) HP27, (E, K) G1-r23nt and (F, L) HP27 with adding **2** (A-F) or **3** (G-L) in 50 mM  $\text{KH}_2\text{PO}_4$ - $\text{K}_2\text{HPO}_4$  buffer (pH 7.0), 25 °C.

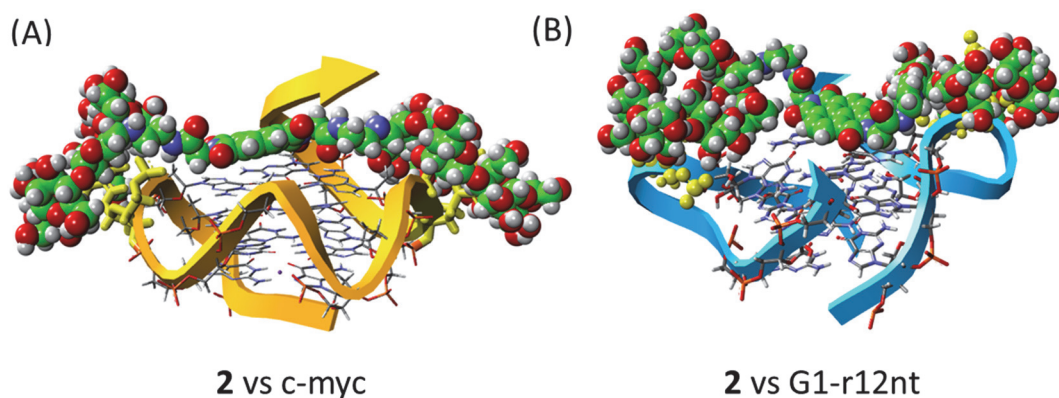

**Figure S12.** Binding model simulation of NDI- $\beta$ -CyDs conjugator **2** with (A) *c-myc* G-quadruplex (PDB:1xav); (B) 12nt of telomere RNA G-quadruplex (PDB: 2kbp).
